# Supplementary material for: Effects of progressive aerobic training on neural synchrony and functional connectivity in internet gaming disorder: A randomized controlled fMRI study
Source: Research Square preprint supplement (doi:10.21203/rs.3.rs-7164866/v1), 2025-08-11
Supplement: Supplementary file 1 [file 85ef6a5bce230afeb7ae8f5b.docx]

**Supplementary materials**

| **Table S1.** Demographic data for the included subjects | | | | | |
| --- | --- | --- | --- | --- | --- |
| Item (*M±SD*) | PAT group  (*N*=33) | FT  (*N*=31) | **t/χ2** | ***p*** | **Effect size** |
| Gender  (Male/Female) | 11/22 | 13/18 | 0.505 | 0.477 | 0.089 |
| Age(years) | 19.94±1.37 | 19.97±1.62 | -0.076 | 0.940 | -0.019 |
| BMI(kg/m²) | 20.54±2.78 | 20.97±2.98 | -0.595 | 0.554 | -0.084 |
| MINI | 0.03±0.17 | 0.13±0.43 | -1.223 | 0.226 | -0.306 |
| AUDIT | 0.70±2.90 | 1.65±3.83 | -1.120 | 0.267 | -0.280 |
| FTND | 0.03±0.74 | 0.00±0.00 | 0.969 | 0.336 | 0.242 |
| IAT | 66.12±10.83 | 62.35±9.64 | 1.466 | 0.148 | 0.367 |
| DSM-5 | 6.48±1.12 | 5.65±1.58 | 2.440 | 0.018 | 0.610 |
| QGU | 34.48±16.33 | 30.13±17.96 | 1.016 | 0.314 | 0.254 |
| **Note.** PAT = progressive aerobic training; FT = free training; M = mean; SD = standard deviation; BMI = body mass index; MINI = Mini International Neuropsychiatric Interview; AUDIT = Alcohol Use Disorders Identification Test; FTND = Fagerström Test for Nicotine Dependence; IAT = Internet Addiction Test; DSM-5 IGD = Diagnostic and Statistical Manual of Mental Disorders, Fifth Edition, Internet Gaming Disorder criteria count; QGU = Questionnaire for Gaming Urge.  Effect size for t-tests reported as Cohen’s d; effect size for chi-square test reported as Phi coefficient (φ). | | | | | |

| | **Table S2.** The detailed intervention program for different groups | | | | --- | --- | --- | | Item | PAT | FT | | Pre-test | IAT, DSM5, QGU, IPAQ Chinese short questionnaire, 3-minute Mcardle pacing test (to obtain maximal oxygen uptake VO2max) and fMRI scan.  Aerobic (at 0% horizontal incline) treadmill speed was obtained from VO2max. The formulae are shown in Supplementary Table S1. | IAT, DSM5, QGU, IPAQ Chinese short questionnaire, 3-minute Mcardle pacing test (to obtain maximal oxygen uptake VO2max) and fMRI scan. | | First 10 sessions Aerobic intervention | The corresponding treadmill speed was calculated for each subject at 46% of the desired intensity.  Before each aerobic exercise, 10 min of warm-up, 40 min of aerobic exercise on the treadmill, followed by 10 min of muscle stretching activities were performed. | No treadmill speed was specified, allowing subjects to train freely. Warm up for 10 min before each exercise. no restriction on the type of exercise (including running, slow walking, jumping rope, stationary bicycle, resistance equipment, etc.). No restriction on the intensity of training, the subjects decided on their own. The duration of the exercise was not limited, and the duration of a single session was not more than 40 min, followed by 10 min of muscle stretching. | | Second test maximal oxygen uptake | 3min Mcardle step test (to obtain maximal oxygen uptake VO2max) | 3min Mcardle step test (to obtain maximal oxygen uptake VO2max) | | Post 10 aerobic interventions | The corresponding treadmill speed was calculated for each subject according to the maximal oxygen uptake VO2max of the second test, recalibrated at 55% of the desired intensity.  Before each aerobic exercise, 10 min of warm-up and 40 min of aerobic exercise on the treadmill were performed, followed by 10 min of muscle stretching activities. | Equivalent to the first 10 training sessions. | | Post-test | IAT, DSM5, QGU, IPAQ Chinese short questionnaire, 3-minute Mcardle pacing test (to obtain maximal oxygen uptake VO2max) and fMRI scan. | IAT, DSM5, QGU, IPAQ Chinese short questionnaire, 3-minute Mcardle pacing test (to obtain maximal oxygen uptake VO2max) and fMRI scan. | | **Note.** PAT = progressive aerobic training; FT = free training; IAT = Internet Addiction Test; QGU = Questionnaire for Gaming Urges; IPAQ = International Physical Activity Questionnaire. | | | | |
| --- | --- | --- | --- | --- | --- | --- | --- | --- | --- | --- | --- | --- | --- | --- | --- | --- | --- | --- | --- | --- | --- | --- | --- | --- | --- |
| **Table S3.** The calculation formula for the step test. | |
| Item | Formula |
| Formula a | 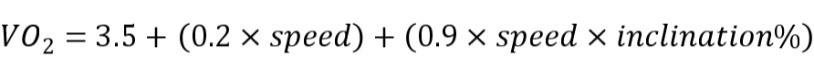 |
| Formula b | 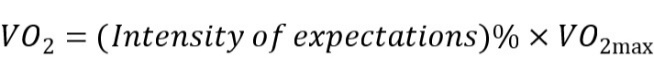 |
| Male of formula | 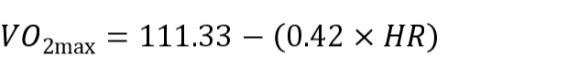 |
| Female of formula | 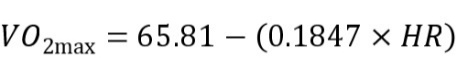 |
| ***Note:*** Inclination % refers to the percentage of incline on a treadmill and represents the vertical rise of an individual by x metres per 100 metres run, i.e. x%; Desired Intensity % is the percentage of oxygen uptake relative to maximal oxygen uptake (VO2max), and the ACSM guidelines recommend that the desired intensity of individuals who have not worked out regularly in the past should be set at a moderate intensity (46-63%) of aerobic training is optimal; HR is the heart rate (bpm). | |

**Table S4**. Comparison of Behavioral Measures Pre- and Post-Intervention (M ± SD)

| Measure | Time Point | PAT Group (N = 33) | FT Group (N = 31） |
| --- | --- | --- | --- |
| IAT | Pre | 66.12（10.825） | 62.35（9.642） |
| Post | 53.70（12.854） | 58.87（10.069） |
| DSM-5 | Pre | 6.38（1.149） | 5.65（1.582） |
| Post | 3.91（2.141） | 4.23（2.125） |
| QGU | Pre | 34.48（16.33） | 30.13（17.957） |
| Post | 27.52（14.52） | 28.61（12.170） |

**Note.** Values are presented as mean (standard deviation).

IAT = Internet Addiction Test; DSM-5 = Diagnostic criteria score based on DSM-5 for Internet Gaming Disorder; QGU = Questionnaire for Gaming Urge; PAT = progressive aerobic training group; FT = free training group.
